# Supplementary material for: Eradication of Helicobacter pylori Is Associated with the Progression of Dementia: A Population-Based Study
Source: PubMed Central journal article supplement (PMC3859120; doi:10.1155/2013/175729), 2013-11-25
Supplement: 175729.f1.pdf [file 175729.f1.pdf]

Supplemental Table 1

| ATC code | Name         | DDD | U  | Adm.R | Note |
|----------|--------------|-----|----|-------|------|
| N06DA02  | Donepezil    | 7.5 | mg | 0     |      |
| N06DA03  | Rivastigmine | 9   | mg | 0     |      |
| 06DA04   | Galatamine   | 16  | mg | 0     |      |

Supplemental Table 2

| Disease                     | ICD-9 CM                                                                                                                    |
|-----------------------------|-----------------------------------------------------------------------------------------------------------------------------|
| Hypertension                | 4010,4011,4019                                                                                                              |
| Diabetes mellitus           | 25000,25002,20510,25012,25020,25022,25030,25032,25040,25042,<br>25050,25052,25060,25062,25070,25072,25080,25082,25090,25092 |
| Cerebrovascular<br>disease  | 24340,4341,4349,436                                                                                                         |
| Coronary heart disease      | 4140,4141,4142,4243,4148,4149                                                                                               |
| Congestive heart<br>failure | 4280,4281,42820,42821,42822,42823,42830,42831,42832,42833,<br>42840,42841,42842,42843,4289                                  |
| Hyperlipidemia              | 2720,2721,2722,2723,2724                                                                                                    |
